# Supplementary material for: Using of Hyperbranched Poly(amidoamine) as Pretanning Agent for Leather
Source: Hindawi journal article supplement (doi:10.1155/2013/120656), 2013-01-01
Supplement: f1 [file 120656.f1.pdf]

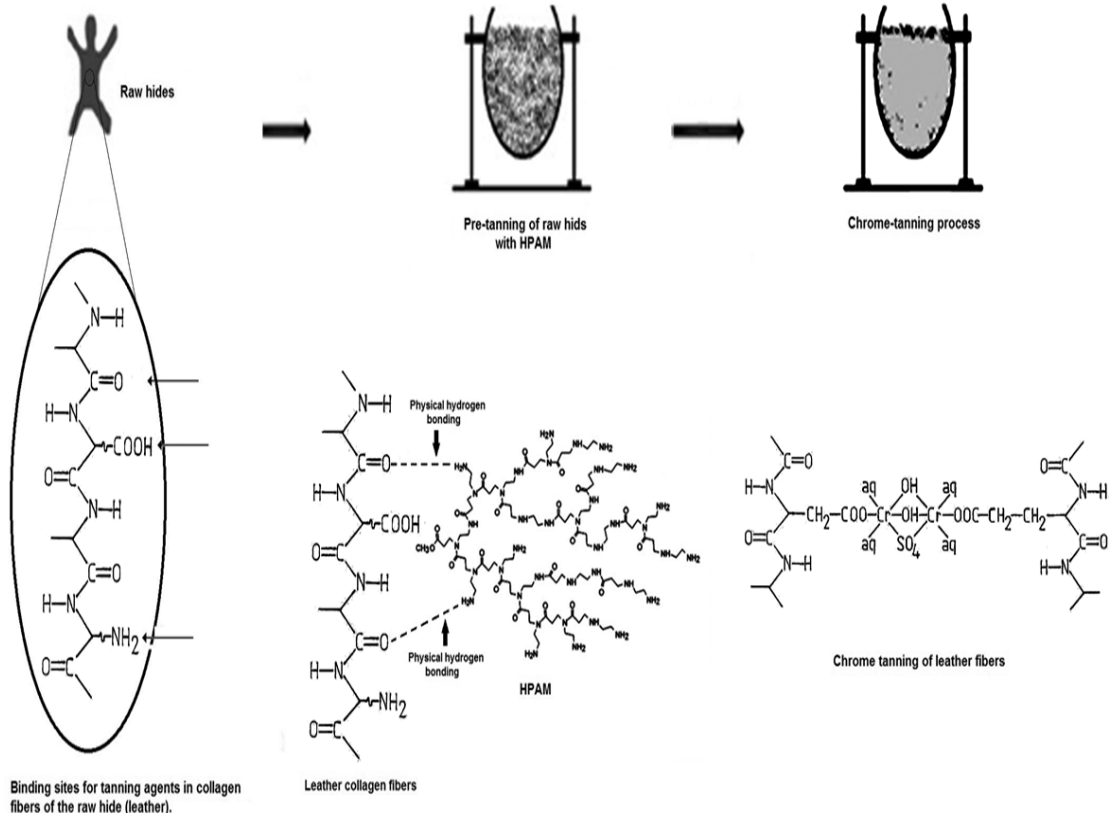

## Supplementary material

Employing of poly amidoamine hyperbranched polymer (HPAM) as pre-tanning agent for leather
